# Supplementary material for: Epigenome-wide association studies of meat traits in Chinese Yorkshire pigs highlights several DNA methylation loci and genes
Source: Front Genet. 2023 Jan 4;13:1028711. doi: 10.3389/fgene.2022.1028711 (PMC9845630; doi:10.3389/fgene.2022.1028711)
Supplement: Supplementary file 8 [file Table1.XLSX]

## Sheet: Sheet1
Supplementary Table 1. Mapping results of reduced representation bisulfite sequencing (RRBS) data in the Yorkshire pigs
Sample name	Raw Reads	Raw Bases(G)	Clean Reads	Clean Bases(G)	Clean_ratio(%)	Q20(%)	Q30(%)	GC Content(%)	BS Conversion Rate(%)	Mapping rate(%)	MspI Cutting Efficiency(%)
Y126203	41158185	12.35	40454905	10.88	88.1	98.03	93.8	36.76	99.43	64.57	99.5
Y127001	48227338	14.47	47282003	9.95	68.76	98.47	94.91	38.19	99.512	56.46	99.7
Y127301	54321903	16.3	53121910	10.41	63.87	98.51	95.04	39.32	99.495	55.14	99.71
Y127611	44142624	13.24	43380487	11.57	87.39	98.06	93.89	37.18	99.648	63.1	93.88
Y127811	48766095	14.63	47923523	12.91	88.24	98.04	93.84	36.94	99.595	65.55	98.15
Y128101	52397987	15.72	51293922	10.79	68.64	98.48	94.95	38.63	99.565	56.33	99.67
Y128207	37964530	11.39	37247501	10.06	88.32	97.86	93.38	36.36	99.641	66	97.55
Y128503	46749468	14.02	45989837	12.28	87.59	97.86	93.43	37.1	99.456	63.61	99.56
Y128602	48104851	14.43	47148830	12.62	87.46	97.98	93.67	37.15	99.655	63.82	97.17
Y128701	46665427	14	45807480	10.45	74.64	98.47	94.81	36.78	99.643	63.01	96.93
Y128705	46332626	14.02	35676122	10.79	77	98.19	94	36.45	99.614	62.79	96.83
Y128805	48550264	14.57	47603723	12.62	86.62	97.93	93.52	37.4	99.432	62.09	99.51
Y129003	38678177	11.6	38019040	10.21	88.02	98.03	93.82	36.8	99.471	65.49	99.54
Y129007	46921598	14.08	46146146	10.44	74.15	98.33	94.51	36.56	99.509	63.6	99.65
Y129503	36051312	10.82	35399562	9.42	87.06	97.81	93.39	36.93	99.659	63.29	97.23
Y130503	54915264	16.47	54009487	14.22	86.34	98.07	93.96	37.92	99.493	59.68	98.92
Y130805	39789262	11.94	38916486	10.36	86.77	97.93	93.58	37.43	99.654	63.47	96.77
Y131301	45847235	13.75	45040373	12.14	88.29	97.99	93.67	37.13	99.634	65.34	96.99
Y131303	42144210	12.64	41454587	11.12	87.97	97.9	93.61	36.59	99.622	66.19	98.28
Y131401	47069446	14.12	46092136	9.93	70.33	98.41	94.76	37.78	99.523	58.03	99.68
Y131405	52095301	15.63	51061304	13.36	85.48	98.12	94.06	38.75	99.538	59.38	99.61
Y131605	52695027	15.81	51732437	11.19	70.78	98.4	94.7	38.08	99.503	55.77	99.66
Y131807	49462865	14.84	48566993	9.34	62.94	98.6	95.29	40.19	99.332	52.47	99.79
Y132603	55695275	16.71	54788781	12.31	73.67	98.4	94.72	37.31	99.597	59.96	99.65
Y132701	40648494	12.19	39965136	9.17	75.23	98.52	94.94	37	99.641	61.2	97.12
Y132709	52213361	15.66	51097576	11.56	73.82	98.31	94.45	37.28	99.518	58.83	99.68
Y132807	48025617	14.41	47029497	10.26	71.2	98.3	94.56	37.69	99.465	59.44	99.64
Y133107	51477765	15.44	50512769	10.23	66.26	98.59	95.27	38.95	99.484	56.85	99.68
Y134603	54871493	16.46	53786757	11.77	71.51	98.29	94.38	38.49	99.546	57.18	99.65
Y15160704	44073314	13.22	43479954	9.6	72.6	98.38	94.69	37.31	99.589	63.13	97.97
Y17152608	48231507	14.47	47261212	9.13	63.08	98.56	95.13	39.68	99.6	56.03	97.3
Y17153802	39527182	11.86	38741458	10.24	86.34	97.99	93.74	37.72	99.642	64.99	97.29
Y17153905	45677945	13.7	44559584	10.9	79.56	98.33	94.43	35.47	99.632	69.3	96.81
Y17154605	49978770	14.99	49035966	11.89	79.32	98.35	94.48	35.66	99.599	68.52	97.22
Y17154611	60901337	18.27	59273904	14.7	80.46	97.62	92.68	34.62	99.526	67.75	97.42
Y17155010	47732733	14.32	46889707	9.84	68.68	98.42	94.78	37.85	99.659	60.26	97.62
Y17155204	45649060	13.69	44645706	10.63	77.65	98.12	94.03	35.42	99.596	65.79	97.24
Y17155207	52707398	15.81	51616848	12.63	79.89	98.33	94.41	35.49	99.55	68.95	97.09
Y17155502	43782139	13.13	43002457	9.2	70.07	98.47	94.9	37.79	99.634	60.29	97.49
Y17155511	47559883	14.27	46727465	12.27	85.98	98.24	94.18	34.47	99.538	72.06	96.76
Y17155609	45494051	13.65	44648587	10.89	79.78	98.23	94.29	35.61	99.594	69.84	96.78
Y17155611	43538122	13.06	42622000	10.46	80.09	98.3	94.36	35.42	99.63	69.55	96.96
Y17156004	42170940	12.65	41346619	9.01	71.23	98.39	94.69	36.97	99.644	63.7	97.37
Y17156102	52882802	15.86	51728642	12.62	79.57	97.58	92.68	35.7	99.627	67.65	96.58
Y17156104	49918343	14.98	48990283	12.57	83.91	98.2	94.08	34.69	99.615	71.28	97.72
Y17156502	44402315	13.32	43620023	9.56	71.77	98.39	94.68	37.2	99.667	61.59	97.93
Y17156506	40023415	12.01	39318119	8.86	73.77	98.12	93.91	36.62	99.592	62.98	97.36
Y17156602	52649944	15.79	51787528	11.66	73.84	98.32	94.52	36.33	99.65	64.43	97.88
Y17156603	55875019	16.76	54769041	12.49	74.52	98.48	94.84	37.26	99.742	64.91	97.98
Y17156606	43031503	12.91	42258326	9.5	73.59	98.32	94.53	36.48	99.619	64.24	97.19
Y17156607	42711447	12.81	42037635	10.64	83.06	98.29	94.32	34.67	99.537	71.02	96.71
Y17157001	48335532	14.5	47551537	12.05	83.1	98.28	94.28	34.43	99.597	70.32	96.81
Y17157002	38513426	11.55	37746334	9.97	86.32	97.92	93.62	37.53	99.616	64.32	97.27
Y17157003	50334130	15.1	49210881	12.37	81.92	97.54	92.51	34.47	99.574	67.82	96.92
Y17157008	50966326	15.29	50095095	11.58	75.74	98.28	94.41	36.68	99.583	63.76	97.92
Y17157014	42999582	12.9	42266303	9.54	73.98	98.26	94.36	36.56	99.659	63.62	98
Y17157105	48140203	14.44	47169895	9.52	65.93	98.69	95.44	39.24	99.696	57.36	97.07
Y17157304	49471546	14.84	48635657	10.75	72.44	98.36	94.62	37.43	99.527	59.88	97.11
Y17157305	43306643	12.99	42541867	10.5	80.83	98.32	94.39	35.66	99.552	68.35	96.82
Y17157307	52395834	15.72	50968337	12.34	78.5	98.33	94.44	36.01	99.574	66.93	96.85
Y17157309	41711053	12.51	41049301	10.24	81.85	98.26	94.26	35.19	99.56	68.68	97.03
Y17157406	39808179	11.94	39002100	7.99	66.92	98.53	95.08	38.21	99.698	58.65	97.43
Y17157412	52120459	15.64	51283031	11.43	73.08	98.34	94.53	36.8	99.647	63.75	97.31
Y17157506	42472556	12.74	41750179	9.9	77.69	98.1	93.92	35.7	99.574	66.39	97.9
Y17157702	43979578	13.19	43129360	11.36	86.13	97.98	93.73	37.61	99.57	64.53	97.4
Y17157903	43043116	12.91	42266755	10.42	80.71	98.22	94.22	35.53	99.455	68.4	96.82
Y17158003	51063141	15.32	50020228	12.53	81.79	98.3	94.37	35.36	99.53	69.27	97.72
Y17158004	49890263	14.97	49049593	11	73.48	98.32	94.52	36.18	99.654	64.54	97.27
Y17158010	43393153	13.02	42675037	11.07	85.02	98.1	94.05	38.83	99.57	62.87	97.26
Y17158013	54054135	16.22	52693524	13.34	82.24	97.57	92.56	34.41	99.531	68.23	96.75
Y17158014	58690379	17.61	56964274	14.05	79.78	97.55	92.53	34.64	99.517	66.41	96.49
Y17158401	55802429	16.74	54812523	13.47	80.47	98.34	94.48	35.89	99.602	67.35	97.85
Y17158416	43868879	13.16	43035611	9.83	74.7	98.23	94.27	36.08	99.63	65.71	97.16
Y17158501	50317548	15.1	49372877	12.67	83.91	98.27	94.25	34.91	99.568	70.14	97.77
Y17158505	38728339	11.62	38081972	9.57	82.36	98.06	93.98	34.94	99.54	69.38	96.81
Y17158607	57459499	17.24	56445147	14	81.21	98.31	94.38	35.55	99.616	68.17	97.45
Y17159009	49132580	14.74	48311790	12.28	83.31	98.27	94.27	34.68	99.52	71.14	96.65
Y17159101	52462880	15.74	51465821	12.96	82.34	98.24	94.17	35.51	99.656	68.94	96.91
Y17159106	40225443	12.07	39482441	9.71	80.45	98.36	94.52	36.2	99.485	67.16	97.91
Y17159607	54942607	16.48	53917474	12.82	77.79	98.43	94.72	36.43	99.459	66.1	96.85
Y17160614	55432469	16.63	54481365	14.54	87.43	98.01	93.78	37.14	99.578	66.08	97.05
Y17162412	58101959	17.43	57072091	14.69	84.28	98.21	94.12	34.18	99.487	71.2	97.59
Y17163810	48009302	14.4	47238504	12.16	84.44	98.27	94.29	34.35	99.599	69.86	97.13
Y17163902	47385965	14.21	46593357	11.89	83.67	98.44	94.81	34.69	99.604	70.13	97.67
Y17163906	51125500	15.34	50280793	12.27	79.99	98.29	94.31	35.56	99.463	69	96.83
Y17164502	43269609	12.98	42545271	10.01	77.12	98.47	94.8	36.49	99.618	65.65	97.66
Y17164608	53401146	16.02	52507286	13.6	84.89	98.17	93.99	34.26	99.602	71.33	96.91
Y17164801	42587342	12.78	41760994	10.33	80.83	97.74	92.72	34.76	99.628	70.22	97.61
Y17164802	50843253	15.25	49981557	12.8	83.93	98.27	94.26	34.1	99.549	72.1	97.08
Y17164803	42782080	12.83	41802929	9.15	71.32	97.93	93.49	37.48	99.582	62.96	97.29
Y17164807	36117377	10.84	35621582	8.89	82.01	98.34	94.48	34.6	99.615	70.78	96.06
Y17164808	46355727	13.91	45256652	10.33	74.26	97.8	93.19	36.81	99.567	64.68	97.19
Y17164905	38548681	11.56	38064037	9.68	83.74	98.3	94.42	34.31	99.526	70.64	96.73
Y17164911	38591113	11.58	37940119	9.21	79.53	98.07	93.77	35.47	99.595	67.04	96.87
Y17165102	61013717	18.3	59994292	15.07	82.35	98.25	94.19	34.92	99.592	69.69	96.8
Y17166008	52420474	15.73	51478064	13.21	83.98	98.24	94.2	34.45	99.474	70.57	97.36
Y17166108	45680815	13.7	44947654	11.57	84.45	98.24	94.18	34.38	99.54	69.95	96.86
Y17166307	61326192	18.4	60536163	15.26	82.93	98.3	94.42	34.32	99.592	71.2	96.46
Y17166702	44614276	13.38	43433078	9.83	73.47	97.76	93.13	36.82	99.624	64.43	97.07
Y17166802	44801127	13.44	44044522	11.31	84.15	98.1	94	34.34	99.568	70.49	97.83
Y17167001	48263661	14.48	47430907	11.79	81.42	97.81	92.94	34.67	99.639	69.32	96.66
Y17167103	64817027	19.45	63724551	15.46	79.49	98.02	93.47	34.73	99.63	68.1	98.17
Y17167202	41084046	12.33	40323237	10.43	84.59	98.16	93.99	34.49	99.621	70.38	96.91
Y17167204	46391175	13.92	45582691	11.83	84.99	98.11	93.93	34.15	99.512	70.64	96.76
Y17167212	51393573	15.42	50510565	12.98	84.18	98.23	94.19	34.66	99.583	69.97	96.83
Y17167603	39099482	11.73	38340294	9.22	78.6	97.75	92.82	35.27	99.611	31.94	96.8
Y17167804	70298013	21.09	69049072	17.68	83.83	98.22	94.15	34.64	99.597	69.33	96.87
Y17168003	33687866	10.11	33274086	8.14	80.51	98.37	94.61	34.92	99.59	68.62	96.25
Y17168110	45914302	13.77	45154576	11.59	84.17	98.26	94.25	34.48	99.518	70.57	97.9
Y17168205	34578423	10.37	33953020	8.24	79.46	97.81	92.94	34.92	99.6	69.29	97.61
Y17168303	42907771	12.87	42265075	10.22	79.41	98.16	94.05	35.82	99.628	66.54	96.89
Y17168903	46206839	13.86	45359285	11.07	79.87	97.78	92.9	34.96	99.548	67.79	97.7
Y17168909	39486894	11.85	38864247	9.18	77.47	98.21	94.18	36.26	99.551	65.58	96.89
Y17169101	39738572	11.92	39022282	9.52	79.87	97.74	92.88	34.98	99.577	68.86	97.71
Y17169205	46448950	15.03	38552628	12.47	83	97.83	93.24	34.46	99.578	69.18	96.79
Y1783703	40647601	12.19	39925882	9.82	80.56	97.82	92.95	34.76	99.637	69.08	96.8
Y1783909	39485207	11.85	38750699	9.24	77.97	97.71	92.69	35.26	99.593	67.59	96.72
Y1784001	33422588	10.03	33038431	7.76	77.37	98.56	95.05	36.19	99.609	67.08	96.19
Y1784007	46448935	13.93	45826441	11.47	82.34	98.3	94.43	34.54	99.549	70.73	96.99
Y1784602	46102252	13.83	45268055	11.65	84.24	98.12	93.89	34.44	99.561	70.38	96.81
Y1785306	53429591	16.03	52320562	13.48	84.09	98.03	93.64	33.98	99.545	71.6	96.89
Y1786112	44936099	13.48	44229191	10.45	77.52	98.08	93.85	35.77	99.605	65.89	97.58
Y1786403	60715900	18.21	59686142	14.55	79.9	98.35	94.49	35.77	99.644	68.03	96.76
Y1786602	40000000	12	39276303	9.49	79.08	98.24	94.23	35.42	99.638	65.89	97.56
Y1786801	42695929	12.81	41899236	10.7	83.53	98.23	94.17	34.88	99.581	71.41	96.69
Y1786803	46998679	14.1	46212818	11.83	83.9	98.13	93.9	34.17	99.586	72.42	96.59
Y1786807	44854101	13.46	44017867	11.08	82.32	98.26	94.24	35.38	99.582	70.04	97.31
Y1787102	44363060	13.31	43591241	10.15	76.23	98.11	93.91	36.07	99.598	64.96	97.6
Y1787201	52158481	15.65	51149319	12.82	81.92	98.27	94.27	35.28	99.647	69.78	96.77
Y90411	50244648	15.07	49400249	10.36	68.75	98.45	94.87	37.74	99.492	58.39	99.66
Y92201	46331026	13.9	45516516	12.23	87.99	98.03	93.8	36.55	99.46	65.95	99.53
Y93001	43173969	12.95	42413308	11.45	88.42	97.93	93.53	36.84	99.63	65.66	97.89
Y93103	47351038	14.21	46504163	12.44	87.54	97.93	93.53	36.87	99.669	64.07	97.26
Y93105	57335075	17.2	56312580	13.58	78.95	98.4	94.62	35.9	99.51	64.39	96.86
Y93205	52277494	15.68	51396860	12.97	82.72	98.26	94.26	34.82	99.417	66.58	96.75
Y93405	50789300	15.24	49949090	9.98	65.49	98.61	95.31	39.62	99.419	52.46	99.7
Y93601	42884004	12.87	41885740	8.46	65.73	98.53	95.07	39.16	99.511	55.78	99.7
Y93701	52805159	15.84	51951636	13.6	85.86	97.71	93.33	38.62	99.543	60.21	99.59
Y93703	45999890	13.8	45277626	11.09	80.36	98.32	94.75	35.41	99.558	66.1	97.1
Y93707	54430660	16.33	53478542	12.32	75.44	98.3	94.45	36.77	99.459	61.81	99.64
